# Supplementary material
Source: PubMed Central journal article supplement (PMC2841525)

**Supplementary Material to :**

**Mo<sup>V</sup> Electron Paramagnetic Resonance of Sulfite Oxidase  
Revisited: the Low pH Chloride signal**

**Christian J. Doonan, Heather L. Wilson, Brian Bennett,  
Roger C. Prince, K. V. Rajagopalan, and Graham N. George**

**Figure S1: X-band ENDOR spectrum of  $^{35}\text{Cl}$  labeled human sulfite oxidase.**

The figure shows an expansion of the 3-5 MHz region ( $\times 10$ ) in which  $^{35}\text{Cl}$  ENDOR is expected. Possible broad resonances are visible but not above the level of the noise, and no definitive  $^{35}\text{Cl}$  ENDOR can be detected.

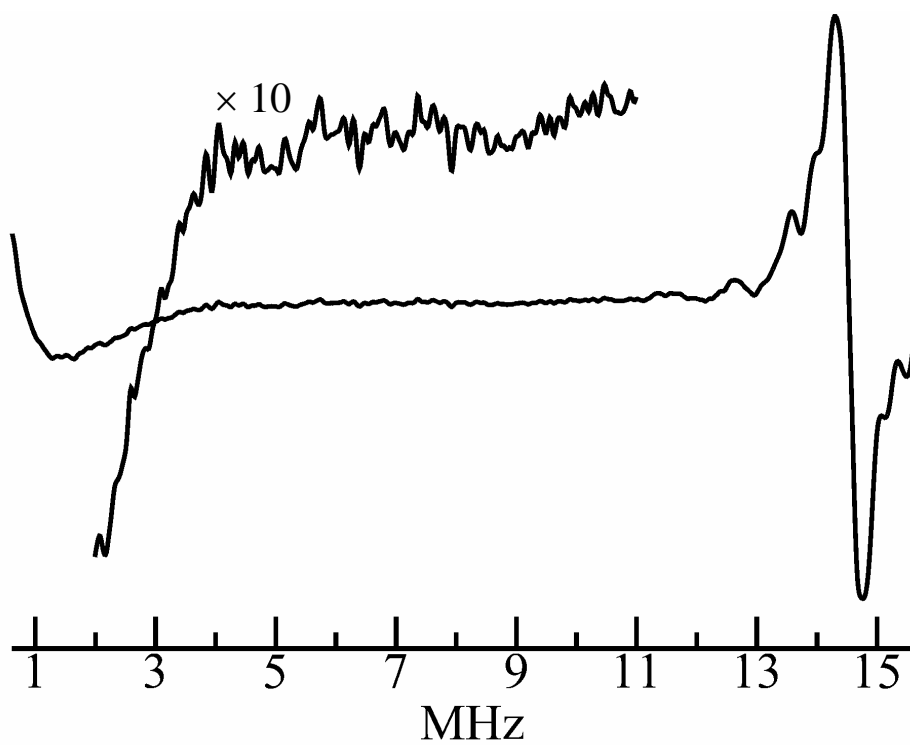

Supplement: NIHMS173234-supplement-2.pdf [file NIHMS173234-supplement-2.pdf]
